# Supplementary material for: Systematic analysis of the Hmga2 3′ UTR identifies many independent regulatory sequences and a novel interaction between distal sites
Source: PubMed Central journal article supplement — RNA. 2015 Jul;21(7):1346–60. doi: 10.1261/rna.051177.115 (PMC4478353; doi:10.1261/rna.051177.115), 2015-07
Supplement: supp_051177.115_SuppTables_S1-S10.pdf [file supp_051177.115_SuppTables_S1-S10.pdf]

**Table S1:** Primers used to generate mouse, human and chicken HMGA2 3'UTR fragments. Forward primers (F) are SpeI tailed and reverse primers (R) are NotI tailed. Coordinates indicate position downstream of stop codon.

| Description  | Sequence                                              | Coordinates |
|--------------|-------------------------------------------------------|-------------|
| 0-F-mouse    | atatactagtGCCGACATTCAATTTCTACCTC                      | 6-27        |
| 100-R-mouse  | atatacgggccgCGCAGGAAGTAGAAAAGACCGTG                   | 88-109      |
| 100-F-mouse  | atatactagtGGGTGGGGCGGG                                | 110-121     |
| 200-R-mouse  | atatacgggccgCCTGGGACTGTGAAGGGATTACAAAG                | 193-218     |
| 200-F-mouse  | atatactagtTTTAGTGAAAACTGCTGTAAACACGGG                 | 219-246     |
| 300-R-mouse  | atatacgggccgATCAGATCCACAACTATTAGTAAGTTAAGG            | 291-321     |
| 300-F-mouse  | atatactagtAAGCAAGGGTGTGTGGTTGAAG                      | 322-343     |
| 400-R-mouse  | atatacgggccgTGCTTTTCTTATACGAATGCCCC                   | 408-431     |
| 400-F-mouse  | atatactagtTTGTGTGACTCTGTGTCCAC                        | 432-453     |
| 500-R-mouse  | atatacgggccgGGAGAGTAGTGTCTAGTTCTCATCTTTG              | 500-527     |
| 500-F-mouse  | atatactagtTTCCTTTGTGTATAATCTGTAGACACTTACTTG           | 528-562     |
| 600-R-mouse  | atatacgggccgTAGCTGTATGAAAAGATACACCAGCATTTTGTCTC       | 597-631     |
| 600-F-mouse  | atatactagtGCAAACCAGAATAGGTTATGCTCG                    | 632-656     |
| 700-R-mouse  | atatacgggccgTGCTGCTGTGTATGAGTCCATAAATG                | 713-738     |
| 700-F-mouse  | atatactagtGGAGTGATAAGCCACAAGCTC                       | 739-760     |
| 800-R-mouse  | atatacgggccgGTTATCTCCGATGCTTCAAGGCTG                  | 821-844     |
| 800-F-mouse  | atatactagtTAGCTGAGTAAAATGATCCTGTTTTGGAATTTAATG        | 845-881     |
| 900-R-mouse  | atatacgggccgTTCGCTCCTCCCATGTCATCAC                    | 914-936     |
| 900-F-mouse  | atatactagtCCGAAATCTCTTTTGCTATATAAAGGACAC              | 937-967     |
| 1000-R-mouse | atatacgggccgAGAGAGGCGAGGGAGAGAAG                      | 1023-1042   |
| 1000-F-mouse | atatactagtCTCCTCTCTATATCCCTGTCTTTCATTGTG              | 1043-1073   |
| 1100-R-mouse | atatacgggccgGGATGTAACACGCAGGCTTCATC                   | 1113-1135   |
| 1100-F-mouse | atatactagtGTAAACCTTTTCATTTTGACATAAGATGGC              | 1136-1166   |
| 1200-R-mouse | atatacgggccgTGCATCTCTGGCTAAAAGTGCAG                   | 1193-1215   |
| 1200-F-mouse | atatactagtATAATCCCCACTCCTCAATACTACCTC                 | 1216-1243   |
| 1300-R-mouse | atatacgggccgTTTTTCCTTCTCTGTCAGGGCTTG                  | 1316-1340   |
| 1300-F-mouse | atatactagtAAAAAGCCCACAAAACCAAACC                      | 1341-1363   |
| 1400-R-mouse | atatacgggccgACATGCATAGCCTGTGAGAC                      | 1430-1451   |
| 1400-F-mouse | atatactagtTTCATGACTTTTTTTTTTTTAAATAAAATGTTACAAATGC    | 1452-1494   |
| 1500-R-mouse | atatacgggccgTCAAAACTGTTTCAAATTAATGTAACAATCTAGC        | 1510-1543   |
| 1500-F-mouse | atatactagtGTCAAGTTGCTCCTAGGTTCTTAAGG                  | 1544-1569   |
| 1600-R-mouse | atatacgggccgAAACTTGGAGACTTATATTTGAACACTACAGATG        | 1612-1645   |
| 1600-F-mouse | atatactagtGTACCTCAAATGAATTATTGAAACAAATGGACTTC         | 1646-1680   |
| 1700-R-mouse | atatacgggccgGGAAATCAATGAGTGATATAGGCTGCAAG             | 1723-1751   |
| 1700-F-mouse | atatactagtTCCCCCATGTTGAAGGAGC                         | 1752-1773   |
| 1800-R-mouse | atatacgggccgGCAAAAGTATGTAAAAAATTGTGTTTCTATCAAGTG      | 1819-1855   |
| 1800-F-mouse | atatactagtAAAAATAAATGAATTAATAAATCAAGCCAACCTTCAAAGAAAC | 1856-1896   |
| 1900-R-mouse | atatacgggccgCTTAGAAATCTATTTTTTCTTTTTCATTGCATTAGGC     | 1928-1967   |
| 1900-F-mouse | atatactagtATTTGTTGCCTAGAAGAATATGCTTGACC               | 1968-1996   |
| 2000-R-mouse | atatacgggccgGCGTCCAAAACAAATCTGCTTGAG                  | 2045-2068   |
| 2000-F-mouse | atatactagtTCTTGTGTAGAGTTTCTATGCTTTTCTCTC              | 2069-2099   |

|                |                                                  |           |
|----------------|--------------------------------------------------|-----------|
| 2100-R-mouse   | atatacgggccgACACAAGCCACTATGAGAACTACC             | 2133-2170 |
| 2100-F-mouse   | atatactagtCAGTATAAGTTAATACTGAAGCCAAATGAAACAAAC   | 2171-2207 |
| 2200-R-mouse   | atatacgggccGCACGTGGCCTTTGAAGTAACCTC              | 2239-2262 |
| 2200-F-mouse   | atatactagtCGCTCTGAGACTGGCAGATG                   | 2263-2282 |
| 2300-R-mouse   | atatacgggccgATTTGATTATTTAATGCATTGTTAACAGTCATGTTG | 2329-2364 |
| 2300-F-mouse   | atatactagtAAACAGTGGCTTATAAATATCAGATTCTCATTC      | 2365-2398 |
| 2400-R-mouse   | atatacgggccgCGAGTCTGGCCAACACGAG                  | 2462-2480 |
| 2400-F-mouse   | atatactagtGCACACCGAGCAATTTCCATC                  | 2481-2502 |
| 2500-R-mouse   | atatacgggccgTATACTGGGACTTAAGAGGTAGTAGTGTG        | 2547-2575 |
| 2500-F-mouse   | atatactagtCCTCATTTTTTCATACTGAAAAAAAAGAAAAAAAAGAG | 2576-2612 |
| 2600-R-mouse   | atatacgggccgAACAGTCTTATAAAATTTATCTCCACAAAAATAAAC | 2673-2709 |
| 2600-F-mouse   | atatactagtTTTTACTGTTGTTGGTCACAGCTAAGTAAG         | 2710-2739 |
| 2700-R-mouse   | atatacgggccgTAATCGTCTTGATAAGTTTTCTCTGCAAAC       | 2782-2811 |
| 2700-F-mouse   | atatactagtACTGCATCCAACTTTTCTCCCC                 | 2812-2832 |
| 2800-R-mouse   | atatacgggccgCACAGACAGCGACTCTACAC                 | 2872-2891 |
| 2800-F-mouse   | atatactagtATTGTACTTGGACGGCTTGC                   | 2892-2911 |
| 2900-R-mouse   | atatacgggccGCCACAGAGGCTGTTATGTTTATTG             | 2952-2977 |
| 0-F-chicken    | atatactagtCGCACCATGCAATTTCTACCTC                 | 6-27      |
| 100-R-chicken  | atatacgggccgAAAAGTGGAAAGACCATGGCAATAG            | 81-105    |
| 100-F-chicken  | atatactagtGCCTGGGGGAAAAAATTGC                    | 106-126   |
| 200-R-chicken  | atatacgggccgCCTGGGACTGTGAAGGGATTATAAAGAAG        | 156-184   |
| 200-F-chicken  | atatactagtTTTAGTGAAAAACTGCTGTAACACAATGG          | 185-213   |
| 300-R-chicken  | atatacgggccgAGCAGCTCAAACAACTATTAGTAGGTTAAG       | 259-289   |
| 300-F-chicken  | atatactagtAAGTAAGGGTGACTGGGTCAAG                 | 290-311   |
| 400-R-chicken  | atatacgggccgAGCCTTTCCTATTCAATGCC                 | 387-408   |
| 400-F-chicken  | atatactagtGGGTGTGTAACACCTAGCCTTG                 | 409-430   |
| 500-R-chicken  | atatacgggccgAAAAAGTAGTATCTATCCCTTATCTTTGGTGTC    | 478-511   |
| 500-F-chicken  | atatactagtTTTTTTTTTTTTTTTTTTGTAACCTTCTGTAG       | 512-544   |
| 600-R-chicken  | atatacgggccgCAGCTGAATGAAGTGAGAGTTCAGC            | 612-636   |
| 600-F-chicken  | atatactagtAATCGGAAGAAAGAGCAACATGAAAAAG           | 637-666   |
| 700-R-chicken  | atatacgggccgTGCTGATATGTTTGTATGAAAACCTATACAACG    | 705-737   |
| 700-F-chicken  | atatactagtGAAGTAGTAGTAAACAAATGAGCAGCC            | 738-765   |
| 800-R-chicken  | atatacgggccgATCATTCTGTTTCCACAGAAAACAC            | 819-844   |
| 800-F-chicken  | atatactagtGACACCAAACACTAACGCCATTAATG             | 845-871   |
| 900-R-chicken  | atatacgggccgGGTACCTTCTACAGATTTAAACACTTATC        | 888-919   |
| 900-F-chicken  | atatactagtTCAAATTAATCGTGAGTTTATCTGAACAAAAC       | 920-952   |
| 1000-R-chicken | atatacgggccgTCTGGTGCAGGGTGAGTGGAATTAG            | 979-1003  |
| 1000-F-chicken | atatactagtTTCAAAACAGGATGGATCTCTCCTTATTAC         | 1004-1033 |
| 1100-R-chicken | atatacgggccgTTAAAGTAATACACAAGCTTAACTGAGGTACATG   | 1062-1095 |
| 1100-F-chicken | atatactagtGCAATGTATTTTGACATAGGATGGTTGAC          | 1096-1124 |
| 1200-R-chicken | atatacgggccgTGCATCTGTTGCTAAAAGTGCTG              | 1171-1193 |
| 1200-F-chicken | atatactagtATATTACCCACTACTCAAAGCTACC              | 1194-1219 |
| 1300-R-chicken | atatacgggccgATTTCTGCATTGAATGTGTATAGCAGC          | 1260-1287 |
| 1300-F-chicken | atatactagtATTTACTGGGTAGATAATCATGAGAATCTTC        | 1288-1318 |

|                |                                                        |           |
|----------------|--------------------------------------------------------|-----------|
| 1400-R-chicken | atatgcccgcAAATACATAGTCATGCTGAAACACAATAAAG              | 1371-1401 |
| 1400-F-chicken | atatactagtCTCTCTCCTTTTGTTTTTTGTTTTTTTAATG              | 1402-1435 |
| 1500-R-chicken | atatgcccgcACAAAAATATATTCAAGTTAACAGTACATTACACAG         | 1462-1497 |
| 1500-F-chicken | atatactagtACTGAATTGCTGATAGGTTTGTAAAG                   | 1498-1523 |
| 1600-R-chicken | atatgcccgcAAACTTGGACAGTAATATTTAAACATTACAGC             | 1569-1600 |
| 1600-F-chicken | atatactagtTACCTCAAATGAATTGTTTAAAGAAATGGAC              | 1601-1632 |
| 1700-R-chicken | atatgcccgcCAAACTAATGCTGAAAGTAAGAAGTTCATTC              | 1671-1702 |
| 1700-F-chicken | atatactagtAGACGTTTGAACAGTTAGGACTGC                     | 1702-1727 |
| 1800-R-chicken | atatgcccgcACGAAAGTAATTTAAATGTATTCATTTCCACAAG           | 1765-1800 |
| 1800-F-chicken | atatactagtATTTAAAAAAAAAAAAATGAACAAAAAAGACCTTC          | 1801-1836 |
| 1900-R-chicken | atatgcccgcTTTTAAACACATATTTGTGATTGCATTATGC              | 1884-1914 |
| 1900-F-chicken | atatactagtAATTAGTAGATTGTAAGAAAATACTTGACAAG             | 1916-1950 |
| 2000-R-chicken | atatgcccgcGCATTTAAATAAATCTGGCTGAAACATATTAC             | 1983-2015 |
| 2000-F-chicken | atatactagtTCTTCTGTAGAGTTTTTTTATTCTCTCTCTC              | 2016-2047 |
| 2100-R-chicken | atatgcccgcACAGACACCTTCTGAGAAAC                         | 2170-2190 |
| 2100-F-chicken | atatactagtTGGCACGGCTTTCGTAGC                           | 2191-2208 |
| 2200-R-chicken | atatgcccgcGTCCGCAGTTCTTGACTCTGC                        | 2256-2276 |
| 2200-F-chicken | atatactagtCTCCTCAAAGACTGCAGAGGG                        | 2277-2298 |
| 2300-R-chicken | atatgcccgcAGCTCGGGTATTTTTTGTTCACCTC                    | 2362-2387 |
| 2300-F-chicken | atatactagtATGCAGTAGCCCTAGCAGG                          | 2388-2406 |
| 2400-R-chicken | atatgcccgcGAAGGTGACACACACCCAG                          | 2551-2570 |
| 2400-F-chicken | atatactagtAACCTCCGAGAGACTGACC                          | 2571-2589 |
| 2500-R-chicken | atatgcccgcTATAGTAGCCCTAAGAGGTAGTAATGTG                 | 2641-2669 |
| 2500-F-chicken | atatactagtCCTCATTTTTTCAGACTGAAAAATTGCATG               | 2670-2699 |
| 2600-R-chicken | atatgcccgcAACAGTCGTATAAAATTTATCTCCAC                   | 2756-2782 |
| 2600-F-chicken | atatactagtCTTTGCTGTCATTGGTCACTGC                       | 2783-2804 |
| 2700-R-chicken | atatgcccgcTAAACATCTTGAAGCGTTTTTTTTTCTCTG               | 2858-2889 |
| 2700-F-chicken | atatactagtACTGCAGTTACTTTTTCTTTGAGTGTG                  | 2890-2918 |
| 2800-R-chicken | atatgcccgcCGTAGACAGCAGCTCTACATGAAG                     | 2939-2962 |
| 2800-F-chicken | atatactagtATTGTACTTCGAATCGCTTGCTTGTG                   | 2963-2989 |
| 2900-R-chicken | atatgcccgcGATCACAGAGGCTATGATGTTTATTGTG                 | 3027-3054 |
| 0-F-human      | atatactagtGCCAACGTTTCGATTTCTACCTCAG                    | 6-29      |
| 100-R-human    | atatgcccgcCAGATGAAAGTGGAAAGACCATGG                     | 87-110    |
| 100-F-human    | atatactagtGGGTGGGGTGGGGTGGGGGAGGGGGGGTGGGGTGGGGAGAAATC | 111-160   |
| 200-R-human    | atatgcccgcCCTGGGACTGTGAAGGGATTACAAAAG                  | 195-220   |
| 200-F-human    | atatactagtTTTAGTGAAAACTGCTGTAACACAGG                   | 221-248   |
| 300-R-human    | atatgcccgcATCAGATCAACAACTATTAGTAGGTTAAGAAAAAAG         | 287-323   |
| 300-F-human    | atatactagtAAGCAAGAGTGGGCGGGTG                          | 324-342   |
| 400-R-human    | atatgcccgcCGTTCTTCTATATGAATGCCCGAC                     | 412-436   |
| 400-F-human    | atatactagtCGGTGTGTAACACTGTGTACACC                      | 437-459   |
| 500-R-human    | atatgcccgcGAAAGTAGTATCTAGTCCTTATCTTTGGTGTTG            | 505-537   |
| 500-F-human    | atatactagtCTTTTTCTGTATAATCTGTAGACACTTACTTGATG          | 538-573   |
| 600-R-human    | atatgcccgcTAGCTGAATGAAAGGATACATCAGCATTTTC              | 603-632   |
| 600-F-human    | atatactagtACAACTAGAAAAGTTATGTTTCAAAAAAGG               | 633-669   |

|              |                                                         |           |
|--------------|---------------------------------------------------------|-----------|
| 700-R-human  | atatgcccgcCTGCTGATATGTGTGATATCCATAAATAGAAGAG            | 695-728   |
| 700-F-human  | atatactagtGAGTAATAAAATTTACTCACAGCACTTGTTTTC             | 729-760   |
| 800-R-human  | atatgcccgcGTTTCCTTAAATGCTCTGAGGCTGAC                    | 833-858   |
| 800-F-human  | atatactagTAGACAAGTAAAATTATCCTCTTTGTAATTTAATGAAAAGG      | 859-899   |
| 900-R-human  | atatgcccgcTTTCGCTCCTCCACCTCATAATTAG                     | 929-954   |
| 900-F-human  | atatactagTCTAAATTTCTTTTGCTATAGTTATACATCAATTTAAAAAGC     | 955-996   |
| 1000-R-human | atatgcccgcAGGAAGAGAGAGAGAGAAAAGACAC                     | 1029-1052 |
| 1000-F-human | atatactagtCTCCCTCTCTTTTCATTGTGTATCAG                    | 1053-1080 |
| 1100-R-human | atatgcccgcTTGAAGTAACACATATGCTTAATTTGAGGTAAG             | 1103-1137 |
| 1100-F-human | atatactaGTAATACGTTTTGACATAAGATGGTTGACC                  | 1138-1167 |
| 1200-R-human | atatgcccgcTGCATCTCTGGCTAAAAGTGCAG                       | 1212-1234 |
| 1200-F-human | atatactagtATATATCCCCACTACTCAATACTACCTCTG                | 1235-1264 |
| 1300-R-human | atatgcccgcTTTTCTTGCATTGCTTGTGTATAGCAG                   | 1303-1330 |
| 1300-F-human | atatactagtAAACTTACTGGGTAGGTGATTCTAATCATC                | 1331-1360 |
| 1400-R-human | atatgcccgcAAATACATAGTCATGCTGAAACACAGTAAGG               | 1405-1435 |
| 1400-F-human | atatactagTTCATGTTTTTTAATTAATAAATTTTAAATACTGTTTCAGC      | 1436-1480 |
| 1500-R-human | atatgcccgcTAAAAAATTTCAAGTTAATGTAGAAATCTAGCAGAG          | 1483-1519 |
| 1500-F-human | atatactagtACCAAGTCGCTCCTAGGTCTTAAG                      | 1520-1544 |
| 1600-R-human | atatgcccgcAGACTTGGAGGGTAATATTTAAATATTACAGTCAAATC        | 1580-1617 |
| 1600-F-human | atatactaGTACCTCAAATGAATTCTTTAAGGAGATGGAC                | 1618-1649 |
| 1700-R-human | atatgcccgcAAAAACAAATGAATGCTGCAAGTAACAAGTTC              | 1692-1723 |
| 1700-F-human | atatactagTCAATGTTTGAATAGTTCAAATGCAAGC                   | 1724-1752 |
| 1800-R-human | atatgcccgcGAAAAGTATGTAACAACTGTTCTTCTATCAAATG            | 1784-1821 |
| 1800-F-human | atatactagtAAAATAAGTAAATAATAAATAAATAAAGCCAACCTTCAAAGAAAC | 1822-1868 |
| 1900-R-human | atatgcccgcCTTAAAAACACATATTTTTGATTGCATTATGCAAAAGC        | 1902-1939 |
| 1900-F-human | atatactagtATTAGTTGAATATAAGAAAATGCTTGACAAATATTTTCATG     | 1940-1980 |
| 2000-R-human | atatgcccgcGCGTTTAAATAAATCTGGTTGAGACATATTAC              | 2004-2036 |
| 2000-F-human | atatactagTTCCTATGTAGAGTTTTTATGCTTTCTCTCC                | 2037-2068 |
| 2100-R-human | atatgcccgcACAAAAGCCGTCATGAGAACTACC                      | 2117-2141 |
| 2100-F-human | atatactagtCAGTATGGCTTTTAGTACTGAAGCCAAATGAACTC           | 2142-2177 |
| 2200-R-human | atatgcccgcGTATGTGGCCTTTGAACTACCTCC                      | 2206-2230 |
| 2200-F-human | atatactagtCTCTCGAGACTGGCAGATCG                          | 2231-2251 |
| 2300-R-human | atatgcccgcATTTGCTTATTTAACGCACAGTTAACAGTAATG             | 2301-2333 |
| 2300-F-human | atatactagtAAACAGTGGCTCATAAAAATAAAGTTCGC                 | 2334-2362 |
| 2400-R-human | atatgcccgcCATGTTTGCCAACATGAGCAATTG                      | 2422-2446 |
| 2400-F-human | atatactaGTGCACCGAGTGATTTCCATC                           | 2447-2467 |
| 2500-R-human | atatgcccgcTATACTGGGACTTAAGAGGTAGTAGTGTG                 | 2514-2542 |
| 2500-F-human | atatactagtCCTCATTTTTCATACTGAAAAAAAAGCTTGTG              | 2543-2575 |
| 2600-R-human | atatgcccgcAACAGTCTATAAAATTTATCTCCACAAAAATAAAC           | 2619-2655 |
| 2600-F-human | atatactagtCTTTGCTGTTGTTGGTGCAG                          | 2656-2676 |
| 2700-R-human | atatgcccgcTAAACGTCTTGATACTTTTCTCCTGCAAAC                | 2728-2757 |
| 2700-F-human | atatactagtACTGCAGTTGACTTTCTCCCTG                        | 2758-2779 |
| 2800-R-human | atatgcccgcCATAGACAGCAATTCTACATAAAGAACAAAG               | 2807-2837 |
| 2800-F-human | atatactagtATTGTACTTTGAATCGCTTGCTTGTG                    | 2838-2864 |

|              |                                       |           |
|--------------|---------------------------------------|-----------|
| 2900-R-human | atatgcgccgcGATCACAGAGGCTGTTATGTTTATTG | 2904-2929 |
|--------------|---------------------------------------|-----------|

**Table S2:** Primers used to generate human *Pim1* 3'UTR fragments. Forward primers (F) are NheI tailed and reverse primers (R) are NotI tailed. Coordinates indicate position downstream of stop codon.

| Description | Sequence                                    | Coordinates |
|-------------|---------------------------------------------|-------------|
| 0-F         | atatgctagcCAGCCTTCTGGCAGGTCCTC              | 1-21        |
| 100-F       | atatgctagcGACAGTGCTTGATACAGGAACAAC          | 103-126     |
| 200-F       | atatgctagcGGCCTCAACTCCTCCCATAG              | 206-225     |
| 300-F       | atatgctagcCTGCCATGGAAGTGTTCCTTC             | 308-329     |
| 400-F       | atatgctagcTCCCTGTCACTCTTCCGACTC             | 412-433     |
| 500-F       | atatgctagcAAAATCTGCCTGGGTTTTGTTC            | 514-537     |
| 600-F       | atatgctagcCCACCTGCCCTTTTTCTGCC              | 618-638     |
| 700-F       | atatgctagcCAAAAAATGCACAACAATGCAATCAAC       | 719-746     |
| 800-F       | atatgctagcTTTTGCCTTTAAGTTATTTTACCTGTTTTGTTC | 822-856     |
| 900-F       | atatgctagcCCCTTCTATTCCAAGCTTCC              | 926-946     |
| 1000-F      | atatgctagcTTTGTGGGTGACGGGACTC               | 1029-1048   |
| 1100-F      | atatgctagcGGGAGGGGCATTGCTGACTG              | 1132-1151   |
| 1200-F      | atatgctagcAGCCTGCTGGTTTTATCTGAGTG           | 1234-1256   |
| 100-R       | atatgcgccgcCTGCTTGCGGAGACGTGTCAC            | 82-102      |
| 200-R       | atatgcgccgcTAGGACCCCTGGAGAGTCAC             | 186-205     |
| 300-R       | atatgcgccgcGGTTCTGACCCACCCAC                | 289-307     |
| 400-R       | atatgcgccgcCTTAAATGGTGCTAGTCCTATCCC         | 387-411     |
| 500-R       | atatgcgccgcTGGAGAAGCAGCAGGTAAGAGAG          | 491-513     |
| 600-R       | atatgcgccgcCTCAGCGTTTGGCCCTG                | 601-617     |
| 700-R       | atatgcgccgcTGTGTGTGAGGCTTGGCTTTG            | 697-718     |
| 800-R       | atatgcgccgcTTTCTTAAAAATTAGATCCACTACAATC     | 794-821     |
| 900-R       | atatgcgccgcAACCAATAAATAAATAAATAAATACATAAC   | 895-925     |
| 1000-R      | atatgcgccgcCAGAGCAAGCGTCGCAGC               | 1011-1028   |
| 1100-R      | atatgcgccgcCATCACCCACAGAGCCGG               | 1114-1131   |
| 1200-R      | atatgcgccgcACCTGCTGCTAAAACACAG              | 1214-1233   |
| 1300-R      | atatgcgccgcTTAAGACAAAAGGTTTTATTCAAAAAACG    | 1308-1337   |

**Table S3:** Primers used to generate mouse 50mer HMGA2 3'UTR fragments. Forward primers (F) are SpeI tailed and reverse primers (R) are NotI tailed. Coordinates indicate position downstream of stop codon.

| Description | Sequence                                                              | Coordinates |
|-------------|-----------------------------------------------------------------------|-------------|
| 50-R-mouse  | atatgcgccgcCTTCTCCCTTCAAAGATCCAAGTATGCTGAGGTAGAAATTGAATGTCG           | 9-57        |
| 50-F-mouse  | atatactagtACACTGCAGTGACCAGTTATCTTAACTGCCACGGTCTTTCTACTTCCTG           | 58-107      |
| 150-R-mouse | atatgcgccgcCGATTTGCGCCACCCCGCCCCGCCCCCTCGCCAGCCCCGCCCCGCCCCACCCactagt | 99-163      |
| 150-F-mouse | atatactagtCATAACCTTGAGAAGGACTATATTAATCAGTTTGTAAATCCCTTCACAGTC         | 164-213     |
| 250-R-mouse | atatgcgccgcAGTTGCATTGTTAACTGTGTCCCGTGTTCACAGCAGTTTTTACT               | 222-269     |
| 250-F-mouse | atatactagtTTAATGACTGTTTTCTTTTCTTAACTTACTAATAGTTTGTGGATCTG             | 270-318     |
| 350-R-mouse | atatgcgccgcGTAGTGACTGATTAAGCCACACAGAGGTTTTCTTCAACCACACACCCTTG         | 325-376     |
| 350-F-mouse | atatactagtATGCAAACCTAAACCGGCACCTGGTGACCGGGGGCATTGATAAGAA              | 377-426     |
| 450-R-mouse | atatgcgccgcATGATCATGGTGGGGTGGCATCTGAGTGGACACAGAGTCACACAAA             | 432-479     |
| 450-F-mouse | atatactagtAGAAAATCTGCTTAGGACACCAAAGATGAGAAGTACTACTACTCTCC             | 480-527     |

|              |                                                                    |           |
|--------------|--------------------------------------------------------------------|-----------|
| 550-R-mouse  | atatgcggccgcAAAAAAGAAAAAAAAAATCAAGTAAGTGTCTACAAGATTATACACAAA       | 532-579   |
| 550-F-mouse  | atatactagtACTTTTCAATTCTGAATGAGACAAAATGCTGGTGTATCTTTTCATACAGC       | 580-629   |
| 650-R-mouse  | atatgcggccgcCTTTTGA AAAACAAAACAAAAGCAAAAACGAGCATAACCTATTCTGG       | 638-684   |
| 650-F-mouse  | atatactagtGGAAGTAAACGAGAACCGTTGACTCCTCCATTTATGGACTCATAACACAGCAGC   | 685-737   |
| 750-R-mouse  | atatgcggccgcTGGCTGTGTAGATTTCCCGAGGCGGAAAGAGAGCTTGTGGGCTTATCACTCCac | 735-791   |
| 750-F-mouse  | atatactagtAAAGCCACTTAGCCATAAATGACACTTGTGAGCCTTGAAGCATCGGAGAT       | 792-841   |
| 850-R-mouse  | atatgcggccgcTTAACCTTTTCATTAATTTCCAAAACAGGATCATTTTACTCAGCTA         | 845-890   |
| 850-F-mouse  | atatactagtCAGTACCCAATGAACCCACCCAAGTGTGACATGGGAGGAGCGAAA            | 891-936   |
| 950-R-mouse  | atatgcggccgcTTATTATTTTTTTTTAAAAAATAGTGTCTTTATATAGCAAAAAGAGAT       | 942-989   |
| 950-F-mouse  | atatactagtAAAAGCTCCCGCTCTCTGTCTCTCCCTCCCTTCTCTCCCTCGCCTC           | 990-1039  |
| 1050-R-mouse | atatgcggccgcTCACGGACTGGTACACAATGAAGAACAGGGAATATAGAGAGGAG           | 1043-1088 |
| 1050-F-mouse | atatactagtAAGACCGCAGTACCACTTACCTCAGATGAAGCCTGCGTGTACATCC           | 1089-1135 |
| 1150-R-mouse | atatgcggccgcAAGATAATGCACCTCGGCTAGCCATCTTATGTCAAAAATGAAAGGTGTT      | 1139-1186 |
| 1150-F-mouse | atatactagtGGTTCGGACTGCCATCTCTGCATTACGCTGCACTTTTAGCCAGAGATGC        | 1187-1236 |
| 1250-R-mouse | atatgcggccgcGCTGTAAATTCACTGTAGCATTAGAGGTAGTATTGAGGAGTGGGGAT        | 1241-1288 |
| 1250-F-mouse | atatactagtCCTGCACTTGTACACGCTGCTAGACACAAGCCCTGCAAGAGAAAAGGAAA       | 1289-1338 |
| 1350-R-mouse | atatgcggccgcGGGATGGCTGAGATGCCGACCAGTAAGGTTTGGTTTGGTTTGGTGGGC       | 1346-1395 |
| 1350-F-mouse | atatactagtCAGTTCTCGACCATTCTCTGTACTCTTACTCCGTCTCAGCAGGCTAT          | 1396-1445 |
| 1450-R-mouse | atatgcggccgcACAAGCATTTGTAACATTTTAATTA AAAAAAAAAAAAAAGTCATAGAA      | 1452-1497 |
| 1450-F-mouse | atatactagtGGCAGCTTCTCTGTAGATTGTTACATTAATTTGAAACAGTTTTGA            | 1498-1543 |
| 1550-R-mouse | atatgcggccgcGTAGTGTCACTGAAAAAAAAAATCTCTTAAGAACCCTAGGAGCAACTT       | 1547-1594 |
| 1550-F-mouse | atatactagtTGTATCACACACACATCTGTAGTGTCAAATATAAGTCTCCAAGTTT           | 1596-1644 |
| 1650-R-mouse | atatgcggccgcTTCCTTGCAAATCAGGAAGTCCATTTGTTTCAATAATTCATTGAGGT        | 1648-1695 |
| 1650-F-mouse | atatactagtCTACCTCCACACTTCCAAAGGAACGAACCTGCAGCCTATATCACTCATTG       | 1696-1745 |
| 1750-R-mouse | atatgcggccgcAATGTTCAATGAGGGAGAGGTGAGGTTTGTAGCTCCTTCAAACATGGGGG     | 1754-1803 |
| 1750-F-mouse | atatactagtTTTTTGGTAAAAGACACTTGATAGAAAACAATTTTTTACATACTTTT          | 1804-1852 |
| 1850-R-mouse | atatgcggccgcGTAGCAAAATTTCAAGTTCTTTGAAGGTTGGCTTGATTTAATTCAT         | 1864-1911 |
| 1850-F-mouse | atatactagtAACCAGCTCAGCCTTTTGCCTAATGCAATGAAAAAGGAAAAAAAAATAGATT     | 1912-1961 |
| 1950-R-mouse | atatgcggccgcTAAAATACATGAAAAAAAAATCGGTCAAGCATATTCTTCTAGGCAACAA      | 1970-2017 |
| 1950-F-mouse | atatactagtCACAATGTGATTTTTGTAAAAAATGTC TCAAGCAGATTTGTTTGGACG        | 2018-2067 |
| 2050-R-mouse | atatgcggccgcAAAGTCAGCACACTTAATAGGAGAGAAAGGCATAGAAACTCTACACAA       | 2072-2119 |
| 2050-F-mouse | atatactagtCCAGAGTGTACCCACTGGGCCAGGAGGTAGTTTCTCATAGTGCTTGTG         | 2120-2169 |
| 2150-R-mouse | atatgcggccgcATGGTTGTTTGTGTTTTCATTGGCTTCAGTATTAACCTATACTG           | 2171-2216 |
| 2150-F-mouse | atatactagtGTCTTCCAGCTGTTTTCAGGGAGGTTACTTCAAAGGCCACGTGC             | 2217-2262 |
| 2250-R-mouse | atatgcggccgcATAGCTCCTTTGGCGACTCACAACAGTGAGCCATCTGCCAGTCTCAGAGCG    | 2263-2313 |
| 2250-F-mouse | atatactagtGGAGAGATTA AAAATTC AACATGACTGTTAACAATGCATTAATAATCAAAA    | 2314-2363 |
| 2350-R-mouse | atatgcggccgcTCTGTAAGGCCCATCCGAAGACCCGGAATGAGAATCTGATATTATAAGCC     | 2372-2422 |
| 2350-F-mouse | atatactagtAACCTCATTTTGGCCAGCTCATAAAAAC TGAAGCAGCTTCTCGTGTGGCCAGAC  | 2423-2477 |
| 2450-R-mouse | atatgcggccgcAGGAAATAAGGAATAACTTCATCAGAGATGGAAATTGCTCGGTGTGC        | 2481-2527 |
| 2450-F-mouse | atatactagtGTATGTTGTACAATCAAACACACTACTACCTCTTAAGTCCCAGTATA          | 2528-2575 |
| 2550-R-mouse | atatgcggccgcCTGTTCCATTGGACACAAGCCTTTTTTTTTCTCTTTTTTTTCTTTTTCAGTATG | 2587-2642 |
| 2550-F-mouse | atatactagtGAGAACATCAAAAATTTTATATATATAGTTTATTTTTGTGGGAGATA          | 2643-2691 |
| 2650-R-mouse | atatgcggccgcTAGAGAAGTTAGATGTCCAGTCTTACTTAGCTGTGACCAACAACAG         | 2715-2760 |
| 2650-F-mouse | atatactagtCCATTTCTGCAAGCTAAGTATGTTTGCAGGAGAACTTATCAAGACGATT        | 2761-2810 |

|              |                                                        |           |
|--------------|--------------------------------------------------------|-----------|
| 2750-R-mouse | atatcgccggcAGAGGGCACACAAAGGAACGGGGAGAAAGTTGGATGCAGT    | 2812-2851 |
| 2750-F-mouse | atatactagtGACTTCGTCTCTGTTCCTTGTGTAGAGTCGCTGTCTGTG      | 2852-2891 |
| 2850-R-mouse | atatcgccggcCACTAGAGAAGGTATTGCCACAAGCAAGCCGTCCAAGTACAAT | 2893-2934 |
| 2850-F-mouse | atatactagtGATTATCACTGTCTGCACAATAAACATAACAGCCTCTGTGGGC  | 2935-2977 |

**Table S4:** Random-sequence controls. Table shows full sequence of random-sequence controls, including restriction sites for cloning (SpeI at 5', NotI at 3')

|                |                                                                                                                                                                                                                                                                                                                                                                                                                                                           |
|----------------|-----------------------------------------------------------------------------------------------------------------------------------------------------------------------------------------------------------------------------------------------------------------------------------------------------------------------------------------------------------------------------------------------------------------------------------------------------------|
| Random 50mer1  | atatactagtACATTAGCAGATCAAAATAACTGAGATCGATTACCTAAAGTAACAGCACTgcccgcgcatat                                                                                                                                                                                                                                                                                                                                                                                  |
| Random 50mer2  | atatactagtATTAGTCACTGTCTACAAAGAGGGCGAGACACCCATCCTCTTTGGGTGATCgcccgcgcatat                                                                                                                                                                                                                                                                                                                                                                                 |
| Random 50mer3  | atatactagtCTACATTGAATTTCAATTCTCAAACCTGAGGACAGCGTAGTATCTGTCCGGTgcccgcgcatat                                                                                                                                                                                                                                                                                                                                                                                |
| Random 100mer1 | atatactagtACATTAGCAGATCAAAATAACTGAGATCGATTACCTAAAGTAACAGCACTATTAGTCAC<br>TGCTACAAAGAGGGCGAGACACCCATCCTCTTTGGGTGATCgcccgcgcatat                                                                                                                                                                                                                                                                                                                            |
| Random 100mer2 | atatactagtCTACATTGAATTTCAATTCTCAAACCTGAGGACAGCGTAGTATCTGTCCGGTCTATTTCGTG<br>TATAAGTCAAGAATGGAACATACTTTGAAATAAGCGGCATgcccgcgcatat                                                                                                                                                                                                                                                                                                                          |
| Random 100mer3 | atatactagtTGTAACAGTCTCCTATCGTCTCCATTCTCTGGATTACCTTGGTGTGAAGCTTCCGTA<br>TCGTCAATCATAGCAATGGATATCAATAGTCTTGTATGTgcccgcgcatat                                                                                                                                                                                                                                                                                                                                |
| Random 200mer1 | atatactagtACATTAGCAGATCAAAATAACTGAGATCGATTACCTAAAGTAACAGCACTATTAGTCAC<br>TGCTACAAAGAGGGCGAGACACCCATCCTCTTTGGGTGATCCTACATTGAATTTCAATTCTCAAAC<br>CTGAGGACAGCGTAGTATCTGTCCGGTCTATTCTGTATAAGTCAAGAATGGAACATACTTTGAA<br>ATAAGCGGCATgcccgcgcatat                                                                                                                                                                                                                |
| Random 200mer2 | atatactagtCATCAGGCAATGAGTGTATTACCACCACGACGTACATTTTCTGTCTCTCATCAATCCA<br>TTTTACCTTTTATTAAGGTTATAGCACTTGGTTAATACTCTACATTGAATTTCAATTCTCAAAC<br>GAGGACAGCGTAGTATCTGTCCGGTCTATTCTGTATAAGTCAAGAATGGAACATACTTTGAAAT<br>AAGCGGCATgcccgcgcatat                                                                                                                                                                                                                     |
| Random 200mer3 | atatactagtACATTAGCAGATCAAAATAACTGAGATCGATTACCTAAAGTAACAGCACTATTAGTCAC<br>TGCTACAAAGAGGGCGAGACACCCATCCTCTTTGGGTGATCCATCAGGCAATGAGTGTATTACC<br>ACCACGACGTACATTTTCTGTCTCTCATCAATCCATTTTACCTTTTATTAAGGTTATAGCACTTG<br>GTTAATACTgcccgcgcatat                                                                                                                                                                                                                   |
| Random 400mer1 | atatactagtAAATCACACTTGTAAACGTTAAACATGCATGTATCTTAATATGGAGCATTTTACAATGGT<br>GTAGGCTAGTAATCTAGTATTTAAACGGGTTGACTTTAATTCTGTCTAGACTATCGGTGTCAAT<br>ATCGCCACTTGTCAATTAACCTCTAAAAGCCATAACTTATATCGTTTAAATCATCACGTATTGTA<br>ATCCCAGCAAAATACTGTAACCTTTAGAAGGCATTAGAGTATATTGGCTGCCACAATCCCAACGA<br>AGCACTTTGACTCCAATTCGCTCTATATTCTTGGATTGGAGGCATTATTGATTCACGTCCAGC<br>TGCGGGGAGTCAACGGATTGGTGTATCAGCTATCCCTGACTAAGGCTTATTCGGGGTTAGACA<br>GCCATTCACCCgcccgcgcatat     |
| Random 400mer2 | atatactagtAAACATCTACCCGTAGAGCTTTAACAGATGTGGTCTTATATACTCAAGAACCCTCCCC<br>AGACGCGGGTTGCAATGTAATTTCTATTTTCGTCTGCTTTATTAAGTACACGCATCCCCCTCACGC<br>ATGATCTAACAGGCACGCTCGCTTATACGTGGACTGCATCCGGTCATTTAATTATCCACGTA<br>GCGTGAAGTAGAAACATATTTCCATATAAGTCCCTGTCTGATTTTCAAAGATAATAAGATACATCT<br>AAGCGAATTCTACCCCTTTATACCTGTACTCACTTATACAGATTTAGCCATTTCAAACCTC<br>TCAGACCTGTATGAATACTCTTTTCGATCCTTTGGGATACTTGTGTAATGTAATAACAGCACATTCA<br>AGAGGGCTACACAAGcccgcgcatat  |
| Random 400mer3 | atatactagtACATTAGCAGATCAAAATAACTGAGATCGATTACCTAAAGTAACAGCACTATTAGTCAC<br>TGCTACAAAGAGGGCGAGACACCCATCCTCTTTGGGTGATCCTACATTGAATTTCAATTCTCAAAC<br>CTGAGGACAGCGTAGTATCTGTCCGGTCTATTCTGTATAAGTCAAGAATGGAACATACTTTGAA<br>ATAAGCGGCATCATCAGGCAATGAGTGTATTACCACCACGACGTACATTTTCTGTCTCTCATC<br>AATCCATTTTACCTTTTATTAAGGTTATAGCACTTGGTTAATACTTGAACACGCTCTCCTATCGT<br>CTTCCATTCTCTGGATTACCTTGGTGTGAAGCTTCCGTATCGTCAATCATAGCAATGGATATCA<br>ATAGTCTTGTATGTgcccgcgcatat |

**Table S5:** Primers used to amplify 100mer HMGA2 3'UTR fragments containing disrupted let-7 target sites. These primers overlap with the mutated let-7 site. Remaining primers used in this experiment did not overlap with let-7 target sites and were therefore identical to primers in Table S1. Forward primers (F) are SpeI tailed and reverse primers (R) are NotI tailed. Coordinates indicate position downstream of stop codon.

| Description         | Sequence                                      | coordinates |
|---------------------|-----------------------------------------------|-------------|
| 0-F-mouse-let-7m    | atatactagtGCCGACATTCAATTTCTAACGC              | 6-27        |
| 1200-F-mouse-let-7m | atatactagtATAATCCCCACTCCTCAATACTAACGC         | 1136-1166   |
| 1600-F-mouse-let-7m | atatactagtGTAACGCAAATGAATTATTGAAACAAATGGACTTC | 1646-1680   |
| 2500-R-mouse-let-7m | atatacgccggcTATACTGGGACTTAAGCGTTAGTAGTGTG     | 2547-2575   |

**Table S6:** Primers used to generate mutations in 200mers where the two corresponding 100mers would meet. These are the mutagenic inside primers; outside primers were from table S1.

| Description                    | Sequence                                                   |
|--------------------------------|------------------------------------------------------------|
| Junct. mut. primer 432-631 F   | GACACTAGATCATAGAAAATGTGTATAATCTTGTAGACACTTACTTGATTTTTTTTTC |
| Junct. mut. primer 432-631 R   | GATTATACACATTTTCTATGATCTAGTGTCTAGTTCTCATCTTTGGTGTC         |
| Junct. mut. primer 2365-2575 F | GTGTTGGCCAGATCATAGAAAACGAGCAATTCCATCTCTGATGAAG             |
| Junct. mut. primer 2365-2575 R | GAAATTGCTCGTTTTTCTATGATCTGGCCAACACGAGAAGCTG                |
| Junct. mut. primer 2481-2709 F | CACACTCTACCTCTTAAGTCCCAGTACTACTCATTTTTTCATACTGAAAAAAAAG    |
| Junct. mut. primer 2481-2709 R | CTTTTTTTTCAGTATGAAAAATGAGTAGTACTGGACTTAAGAGGTAGAGTGTG      |

**Table S7:** Primers used to generate HMGA2 3'UTR 50mer fragments with a substitution mutation at tiling intervals across the 50mer. Forward primers (F) are SpeI tailed and reverse primers (R) are NotI tailed. If a forward or reverse primer is not indicated, this indicates that a wild type primer was used from Table S3.

| Description          | Sequence                                                      |
|----------------------|---------------------------------------------------------------|
| Scan_mut1_528-579_F  | atatactagtATTAGTCACTGTTAATCTTGTAGACACTTACTTG                  |
| Scan_mut1_528-579_R  | atatgcgccgcAAAAAAGAAAAAAAATCAAGTAAGTGTCTACAAGATTAACAGTGAC     |
| Scan_mut2_528-579_F  | atatactagtTTCTTTGATTAGTCACTGTTAGACACTTACTTG                   |
| Scan_mut2_528-579_R  | atatgcgccgcAAAAAAGAAAAAAAATCAAGTAAGTGTCTAACAGTGACTAATCAAA     |
| Scan_mut3_528-579_F  | atatactagtTTCTTTGTGTATAATATTAGTCACTGTTACTTG                   |
| Scan_mut3_528-579_R  | atatgcgccgcAAAAAAGAAAAAAAATCAAGTAACAGTGACTAATATTATACACAAA     |
| Scan_mut4_528-579_F  | atatactagtTTCTTTGTGTATAATCTTGTAGAATTAGTCACTG                  |
| Scan_mut4_528-579_R  | atatgcgccgcAAAAAAGAAAAAAAACAGTGACTAATTCTACAAGATTATACACAAA     |
| Scan_mut5_528-579_F  | atatactagtTTCTTTGTGTATAATCTTGTAGACACTTACTATTAG                |
| Scan_mut5_528-579_R  | atatgcgccgcAAAAAAGACAGTGACTAATAGTAAGTGTCTACAAGATTATACACAAA    |
| Scan_mut6_528-579_R  | atatgcgccgcACAGTGACTAATAAAAATCAAGTAAGTGTCTACAAGATTATACACAAA   |
| Scan_mut1_631-684_F  | atatactagtATTAGTCACTGTAGGTTATGCTCGTTTTTTG                     |
| Scan_mut1_631-684_R  | atatgcgccgcTTTTTGAAAAACAAAACAAAGCAAAAAACGAGCATAACCTACAGTGAC   |
| Scan_mut2_631-684_F  | atatactagtGCAAACCAATTAGTCACTGTCTCGTTTTTTG                     |
| Scan_mut2_631-684_R  | atatgcgccgcTTTTTGAAAAACAAAACAAAGCAAAAAACGAGACAGTGACTAATTGG    |
| Scan_mut3_631-684_F  | atatactagtGCAAACCAGAAATAGGTATTAGTCACTGTTTG                    |
| Scan_mut3_631-684_R  | atatgcgccgcTTTTTGAAAAACAAAACAAAGCAAAACAGTGACTAATACCTATTCTGG   |
| Scan_mut4_631-684_R  | atatgcgccgcTTTTTGAAAAACAAAAACAGTGACTAATCGAGCATAACCTATTCTGG    |
| Scan_mut5_631-684_R  | atatgcgccgcTTTTTGAAACAGTGACTAATGCAAAAAACGAGCATAACCTATTCTGG    |
| Scan_mut6_631-684_R  | atatgcgccgcACAGTGACTAATAAAAACAAAGCAAAAAACGAGCATAACCTATTCTGG   |
| Scan_mut1_990-1042_F | atatactagtATTAGTCACTGTCTCTCTGCTCTCTCCCTCCCTTCTCTCCCTCGCCTC    |
| Scan_mut2_990-1042_F | atatactagtAAACAGCTATTAGTCACTGTCTCTCTCCCTCCCTTCTCTCCCTCGCCTC   |
| Scan_mut3_990-1042_F | atatactagtAAACAGCTCCCGCTCTATTAGTCACTGTCTCTCCCTTCTCTCCCTCGCCTC |
| Scan_mut4_990-1042_F | atatactagtAAACAGCTCCCGCTCTCTGCTCTCATTAGTCACTGTCTCTCCCTCGCCTC  |
| Scan_mut4_990-1042_R | atatgcgccgcAGAGAGGCGAGGGAGAGACAGTGACTAATG                     |
| Scan_mut5_990-1042_F | atatactagtAAACAGCTCCCGCTCTCTGCTCTCTCCCTCATTAGTCACTGTCTCGCCTC  |
| Scan_mut5_990-1042_R | atatgcgccgcAGAGAGGCGACAGTGACTAATGAG                           |
| Scan_mut6_990-1042_F | atatactagtAAACAGCTCCCGCTCTCTGCTCTCTCCCTCCCTTCTCTATTAGTCACT    |
| Scan_mut6_990-1042_R | atatgcgccgcAACAGTGACTAATAGAGAAGGGAGGGAG                       |

**Table S8:** Primers used to delete candidate AREs from full length HMGA2 (intact or let-7 disrupted) reporter constructs. These are the mutagenic inside primers; outside primers were from table S1.



| Description       | Sequence                                                      |
|-------------------|---------------------------------------------------------------|
| Mut-ARE-I-del-F   | CTTTGTGTATAATCTTGTAGACACTTACTTGAACCTTTTCAATTCTGAATGAGACAAAATG |
| Mut-ARE-I-del-R   | CAGAATTGAAAAGTTCAAGTAAGTGTCTACAAGATTATACACAAAAGAAAGGAGAGTAG   |
| Mut-ARE-II-del-F  | CTAGCAAACCAGAATAGGTTATGCTCGAAAAAGGGAAGTAAACGAGAACC            |
| Mut-ARE-II-del-R  | CAACGGTCTCGTTTACTTCCCTTTTTCGAGCATAACCTATTCTGGTTTG             |
| Mut-ARE-III-del-F | AAAAAATAATAAAAACAGCTCCCGCTCTCTGTCCCTCGCCTCTCTCTCC             |
| Mut-ARE-III-del-R | CAGGGAATATAGAGAGGAGAGAGAGGGCGAGGGACAGAGAGCGGGAGCTG            |

**Table S9:** Hairpins used in knockdown experiments.

| Target transcript | TRC shRNA hairpin reference |
|-------------------|-----------------------------|
| GFP               | TRCN0000072181              |
| GFP               | TRCN0000072182              |
| GFP               | TRCN0000072197              |
| GFP               | TRCN0000072201              |
| LacZ              | TRCN0000072223              |
| LacZ              | TRCN0000072224              |
| HuR               | TRCN0000276129              |
| HuR               | TRCN0000285493              |

**Table S10:** Primers used in qRT-PCR assays, forward primers (F), reverse primers (R).

| Description | Sequence             |
|-------------|----------------------|
| HuR-F       | CTCGGTTTGGGCGGATCATC |
| HuR-R       | TTCTGCCTCCGACCGTTTG  |
| GAPDH-F     | CCTGTTTCGACAGTCAGCCG |
| GAPDH-R     | CGACCAAATCCGTTGACTCC |
